# Supplementary material for: Greater Adherence to Dietary Guidelines Associated with Reduced Risk of Cardiovascular Diseases in Chinese Patients with Type 2 Diabetes
Source: MDPI journal article supplement (doi:10.3390/nu14091713), 2022-04-20
Supplement: s1 [file s1]

Online Supplemental Table S1. Components and scoring standards of HEI-2015 and CHEI scores with the standard cup/ounce equivalents and standard portion from MPED and DGC-2016 <sup>a</sup>

|                 | HEI-2015 <sup>b</sup>                               |                                                       | CHEI                                                        |                                                       |
|-----------------|-----------------------------------------------------|-------------------------------------------------------|-------------------------------------------------------------|-------------------------------------------------------|
|                 | Maximum points and standard for maximum score       | Minimum points and standard for minimum score of zero | Maximum points and standard for maximum score               | Minimum points and standard for minimum score of zero |
| Component       | 100 points total (13 components: 5-10 points each)  |                                                       | 100 points total (17 components: 5-10 points each)          |                                                       |
| <b>Adequacy</b> |                                                     |                                                       |                                                             |                                                       |
| Fruits          | Total fruits 5 points: ≥0.8 cup equiv.              | 0 point: no fruit                                     | Total fruits 10 points: ≥1.1 SP                             | 0 point: no fruit                                     |
|                 | Whole fruits <sup>c</sup> 5 points: ≥0.4 cup equiv. | 0 point: no whole fruit                               |                                                             |                                                       |
| Vegetables      | Total vegetables 5 points: ≥1.1 cup equiv.          | 0 point: no vegetables                                | Total vegetables 5 points: ≥1.9 SP                          | 0 point: no vegetables                                |
|                 | Greens and beans 5 points: ≥0.2 cup equiv.          | 0 point: no greens or beans                           | Dark vegetables 5 points: ≥0.9 SP                           | 0 point: no dark vegetables                           |
| Grains          | Whole grains 10 points: ≥1.5 oz equiv.              | 0 point: no whole grains                              | Total grains 5 points: ≥2.5 SP                              | 0 point: no grains                                    |
|                 |                                                     |                                                       | Whole grains and mixed beans <sup>d</sup> 5 points: ≥0.6 SP | 0 point: no whole grains or mixed beans               |
|                 |                                                     |                                                       | Tubers 5 points: ≥0.3 SP                                    | 0 point: no tubers                                    |
| Dairy           | 10 points: ≥1.3 cup equiv.                          | 0 point: no dairy                                     | 5 points: ≥0.5 SP                                           | 0 point: no dairy                                     |
| Protein foods   | Total protein foods 5 points: ≥2.5 oz equiv.        | 0 point: no protein foods                             | Soybeans 5 points: ≥0.4 SP                                  | 0 point: no soybeans                                  |
|                 | Seafood and plant proteins 5 points: ≥0.8 oz equiv. | 0 point: no seafood or plant proteins                 | Fish and seafood 5 points: ≥0.6 SP                          | 0 point: no fish or seafood                           |
|                 |                                                     |                                                       | Poultry 5 points: ≥0.3 SP                                   | 0 point: no poultry                                   |

|                   |                                                  |                                |                                                                        |                                                |
|-------------------|--------------------------------------------------|--------------------------------|------------------------------------------------------------------------|------------------------------------------------|
| Fats              | (PUFAs + MUFAs)/SFAs ratio 10 points: $\geq 2.5$ | 0 point: $\leq 1.2$            | Eggs 5 points: $\geq 0.5$ SP<br>Seeds and nuts 5 points: $\geq 0.4$ SP | 0 point: no eggs<br>0 point: no seeds and nuts |
| <b>Moderation</b> |                                                  |                                |                                                                        |                                                |
| Refined grains    | 10 points: $\leq 1.8$ oz equiv.                  | 0 point: $\geq 4.3$ oz equiv.  |                                                                        |                                                |
| Red meats         |                                                  |                                | 5 points: $\leq 0.4$ SP                                                | 0 point: $\geq 3.5$ SP                         |
| Sodium            | 10 points: $\leq 1.1$ grams                      | 0 point: $\geq 2.0$ grams      | 10 points: $\leq 1000$ mg                                              | 0 point: $\geq 3608$ mg                        |
| Added sugar       | 10 points: $\leq 6.5\%$ of energy                | 0 point: $\geq 26\%$ of energy | 5 points: $\leq 10\%$ of energy                                        | 0 point: $\geq 20\%$ of energy                 |
| Oils/fats         | Saturated fats 10 points: $\leq 8\%$ of energy   | 0 point: $\geq 16\%$ of energy | Cooking oils 10 points: $\leq 15.6$ g                                  | 0 point: $\geq 32.6$ g                         |
| Alcohol           |                                                  |                                | 5 points: $\leq 60$ g (men)/40 g (women)                               | 0 point: $\geq 25$ g (men)/15 g (women)        |

Abbreviations: HEI-2015, Healthy Eating Index-2015; CHEI, Chinese Healthy Eating Index; MPED, MyPyramid Equivalents Database; oz, ounce; equiv., equivalent; DCG-2016, Dietary Guidelines for Chinese Residents; SP, standard portion; PUFA, polyunsaturated fatty acids; MUFA, monounsaturated fatty acids; SFA, saturated fatty acids.

<sup>a</sup> Food consumption and scores are expressed as cup/ounce equivalents from MPED: 1 cup equivalent=225ml, 1 oz equivalent=28.3g; foods consumption and scores are expressed as standard portion from DGC-2016, SP in one food group shares similar energy and contents of carbohydrates, fats, and protein;

<sup>b</sup> Using energy density approach: all components consumption except (PUFAs + MUFAs)/SFAs ratio and alcohol are per 1000kcal.

<sup>c</sup> Including all forms fruit except fruit juice.

<sup>d</sup> Mixed beans include mung bean, red bean, broad bean, pea and kidney bean, etc.
